# Supplementary material for: Accelerated non-crosslinking assembly of DNA-functionalized nanoparticles in alcoholic solvents: for application in the identification of clear liquors
Source: Royal Society of Chemistry journal article supplement (doi:10.1039/d0an00029a), 2020-01-01
Supplement: d0an00029a1.pdf [file d0an00029a1.pdf]

*Supporting Information for*

**Accelerated Non-Crosslinking Assembly of DNA-Functionalized  
Nanoparticles in Alcoholic Solvents: Towards Application in  
Identification of Clear Liquors**

Luyang Wang,<sup>a</sup> Guoqing Wang,<sup>\*a, b</sup> Yali Shi,<sup>a</sup> Lan Zhang,<sup>a</sup> Ran An,<sup>a</sup> Tohru  
Takarada,<sup>c</sup> Mizuo Maeda<sup>c</sup> and Xingguo Liang<sup>a, b</sup>

*<sup>a</sup>College of Food Science and Engineering, Ocean University of China, 5 Yushan Road,  
Qingdao 266003, China*

*Email: gqwang@ouc.edu.cn*

*<sup>b</sup>Laboratory for Marine Drugs and Bioproducts, Pilot National Laboratory for Marine Science  
and Technology (Qingdao), Qingdao 266237, China*

*<sup>c</sup>Bioengineering Laboratory, RIKEN Cluster for Pioneering Research, 2-1 Hirosawa, Wako,  
Saitama 351-0198, Japan*

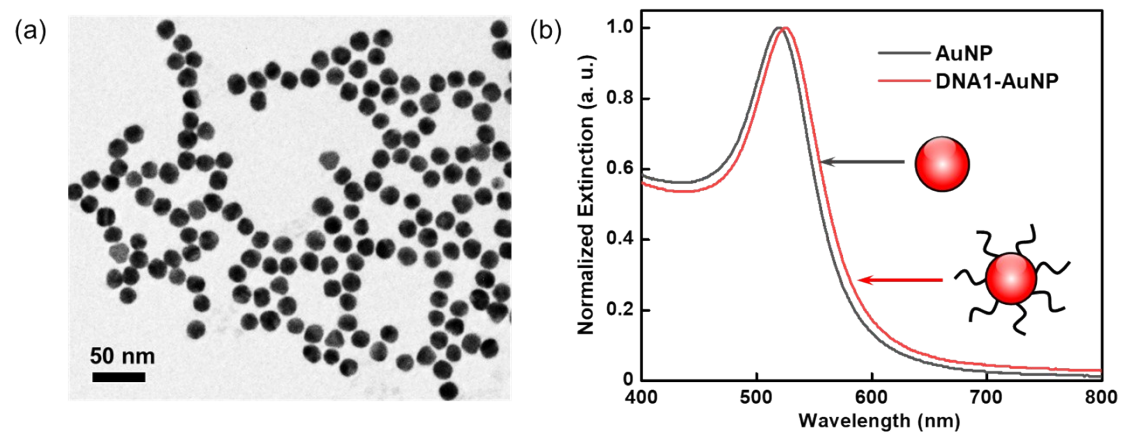

**Fig. S1** (a) TEM image of the AuNPs adopted in this study. (b) Extinction spectra of AuNPs before and after functionalization with DNA1 (DNA1–AuNPs).

**Table S1.** Zeta potential analysis for the DNA1–AuNPs at low ionic strength in different solvents, and that in the absence and presence of com-DNA1 at high ionic strength.

| <b>Solvent</b> | <b>Before NaCl<br/>addition</b> | <b>Without com-DNA1<br/>(~0.97 M NaCl)</b> | <b>With com-DNA1<br/>(~0.94 M NaCl)</b> |
|----------------|---------------------------------|--------------------------------------------|-----------------------------------------|
| Water          | -14.7 mV                        | -7.2 mV                                    | -9.9 mV                                 |
| 5% EtOH        | -17.3 mV                        | -9.0 mV                                    | -3.5 mV                                 |
| 20% EtOH       | -12.6 mV                        | -16.0 mV                                   | -10.5 mV                                |
| 40% EtOH       | -17.1 mV                        | -6.6 mV                                    | -3.2 mV                                 |

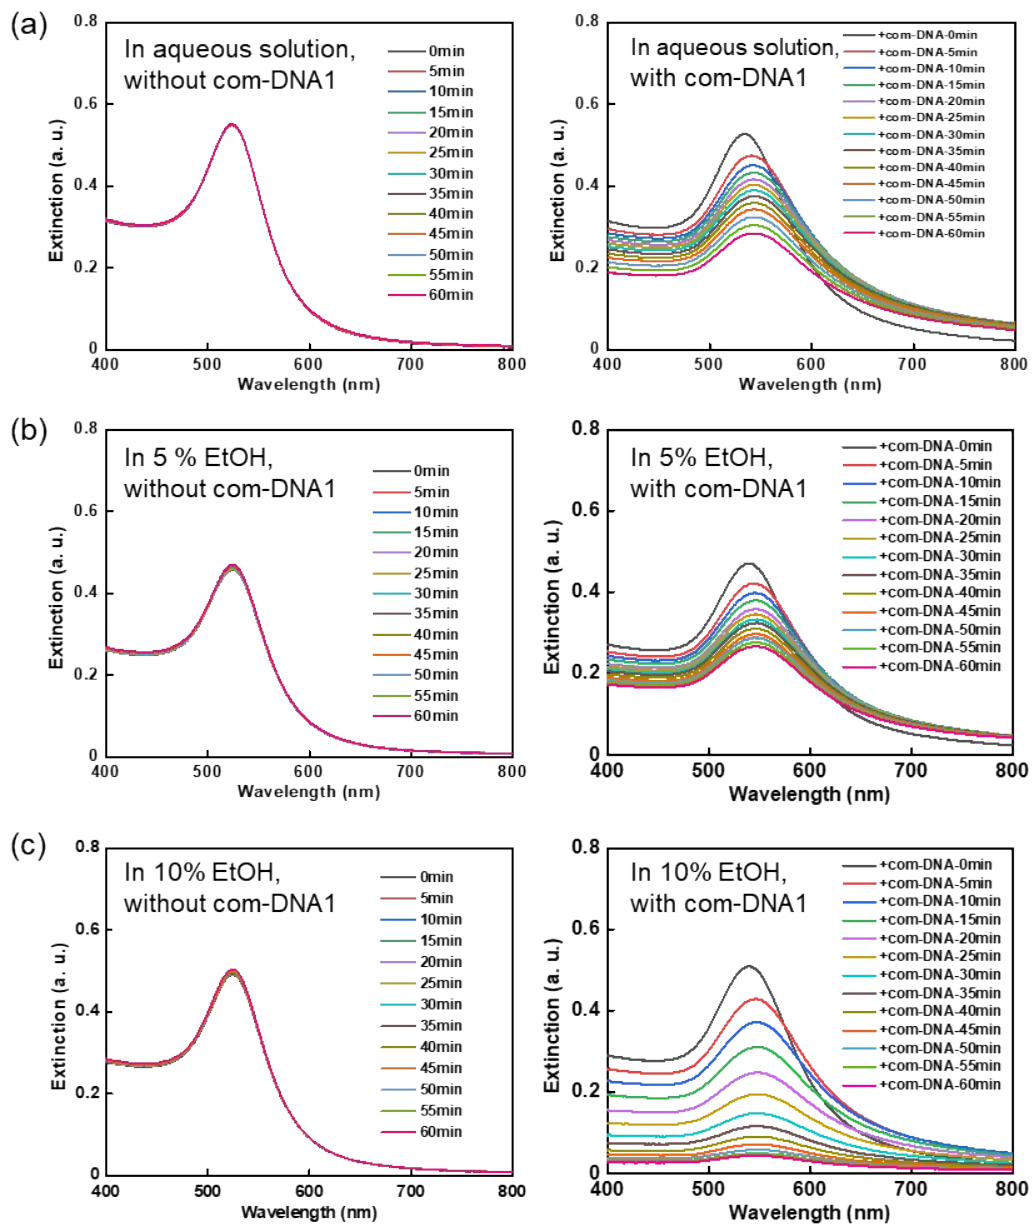

To be continued

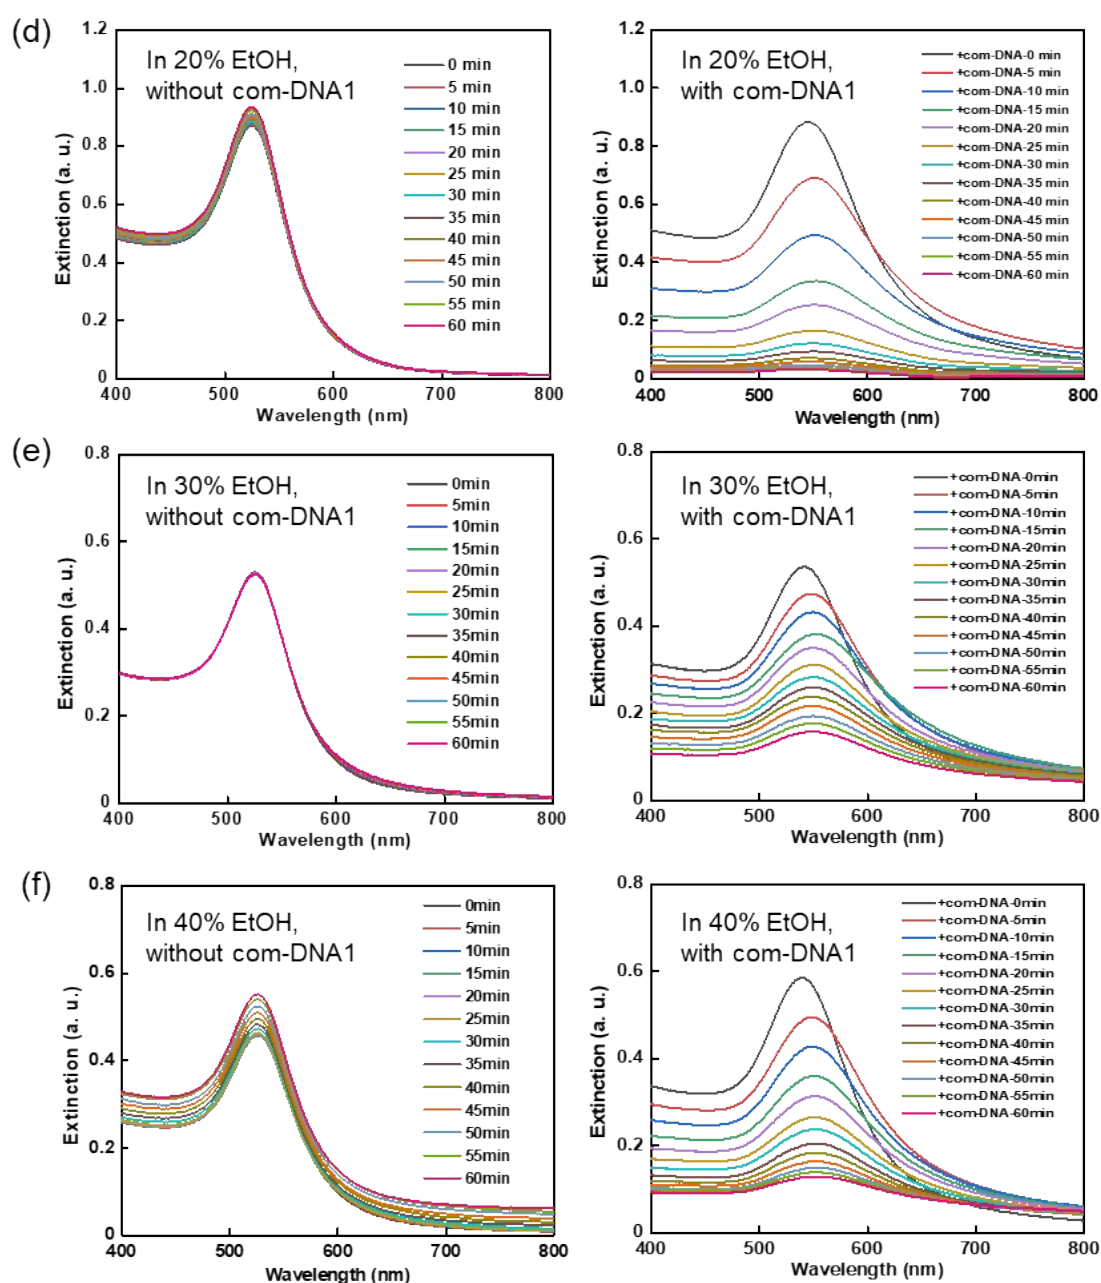

**Fig. S2** Time-dependent change of the extinction spectrum of DNA1-AuNPs in 10 mM PB solutions (pH 7.4) containing 0.97 M NaCl before (left) and after (right) addition of com-DNA1 in 0% (a), 5% (b), 10% (c), 20% (d), 30% (e), and 40% (f) EtOH. A final AuNP concentration of 5 nM was used in all the experiments.

(a) In aqueous solution

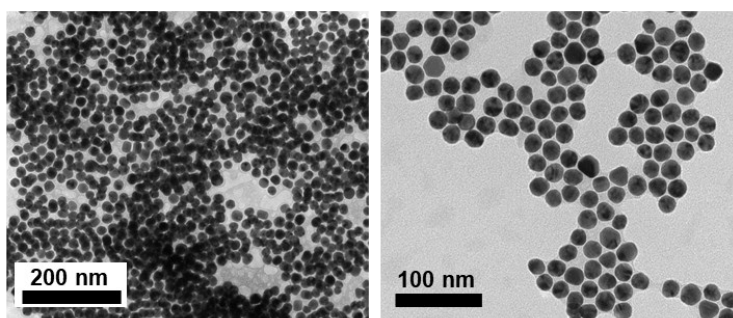

(b) In 20% EtOH

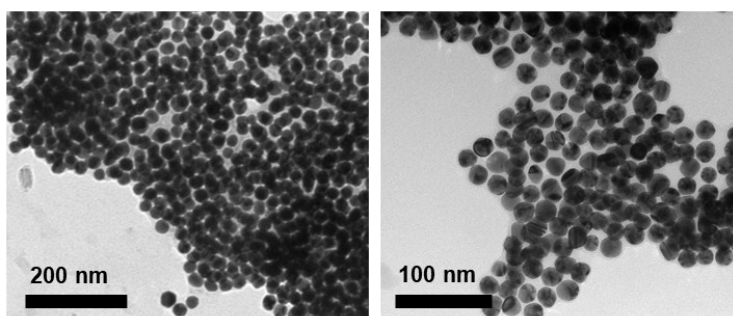

(c) In 20% IPA

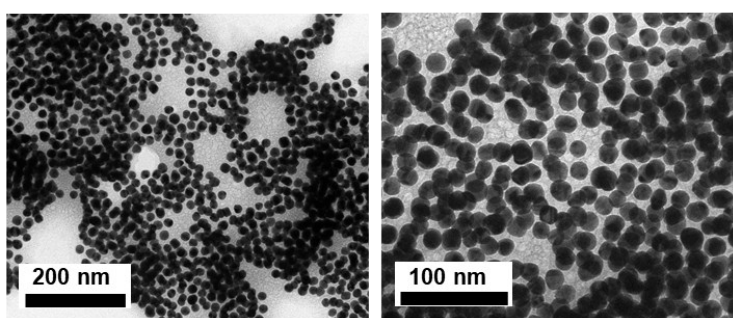

**Fig. S3** TEM images of DNA1-AuNPs upon hybridization to com-DNA1 in aqueous solution (a), 20% EtOH (b), and 20% IPA (c).

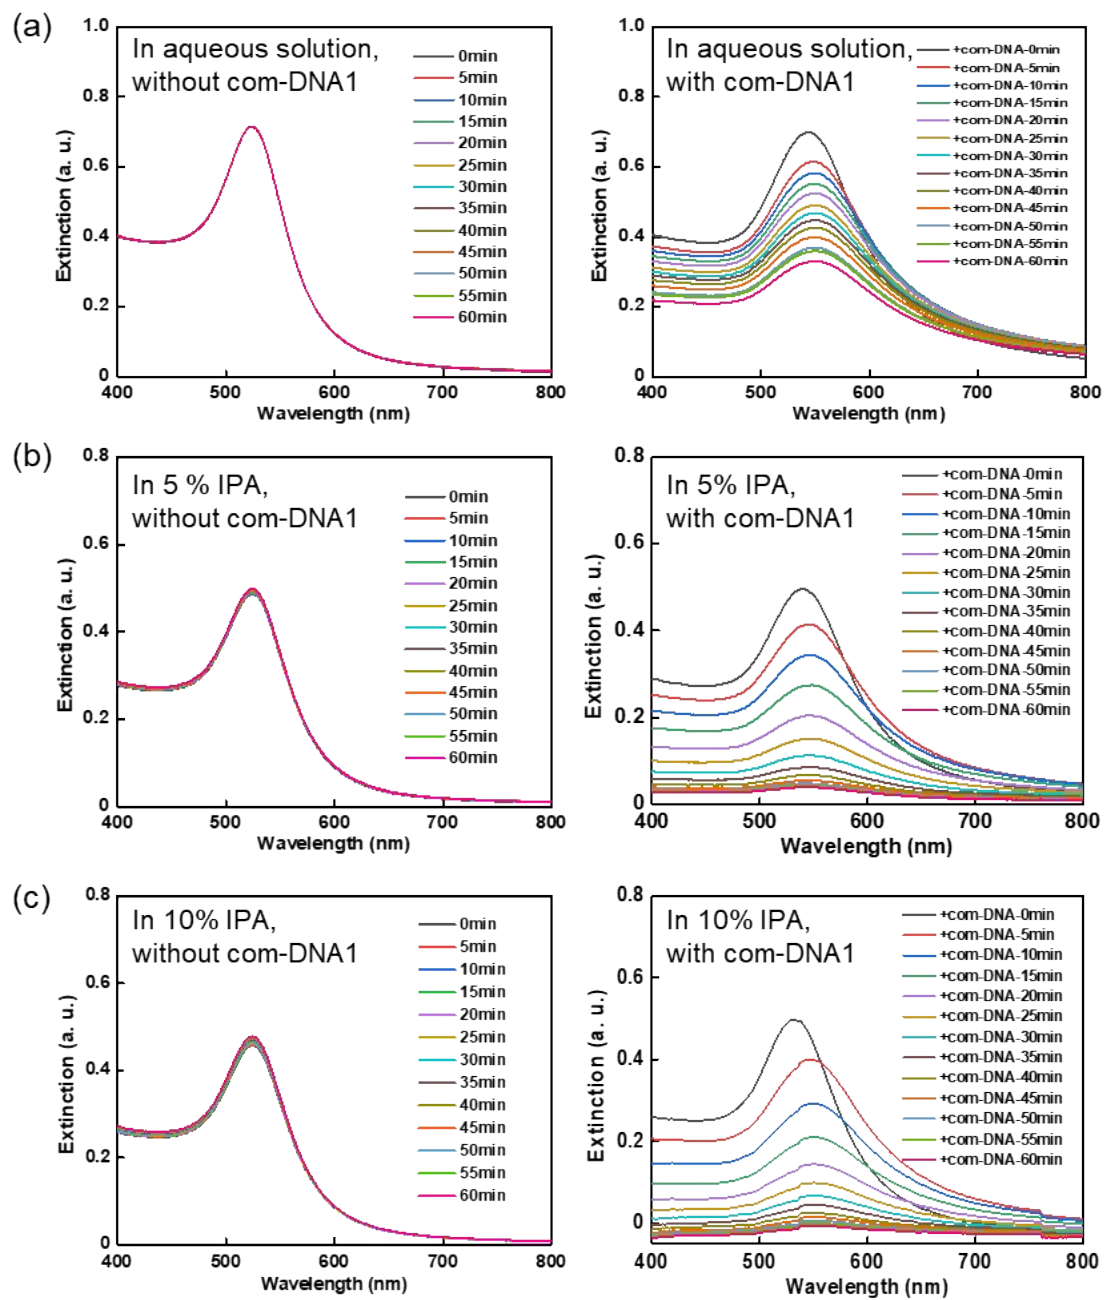

To be continued

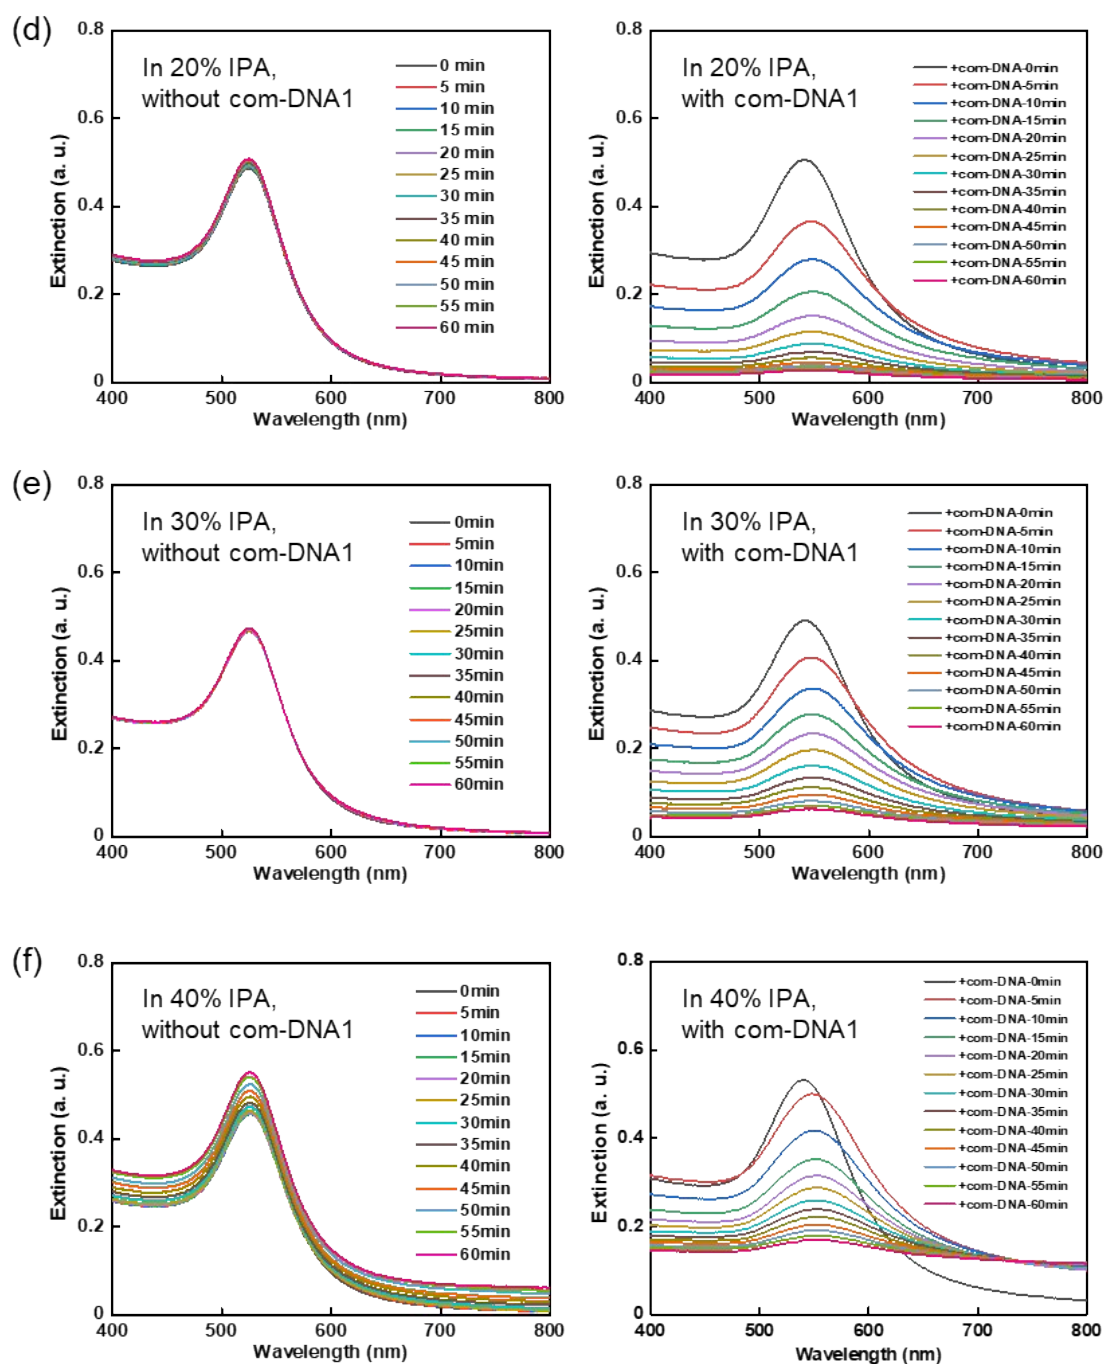

**Fig. S4** Time-dependent change of the extinction spectrum of DNA1-AuNPs in 10 mM PB solutions (pH 7.4) containing 0.97 M NaCl before (left) and after (right) addition of com-DNA1 in 0% (a), 5% (b), 10% (c), 20% (d), 30% (e), and 40% (f) IPA. A final AuNP concentration of 5 nM was used in all the experiments.



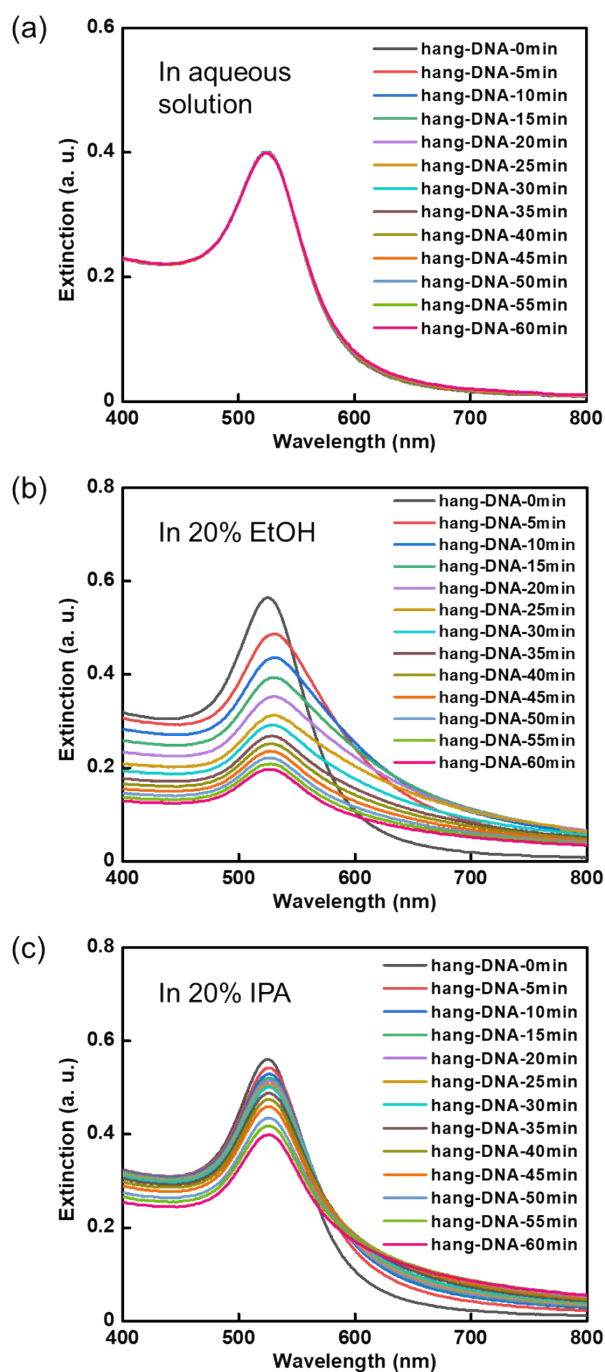

**Fig. S5** Time-dependent change of the extinction spectrum of DNA1–AuNPs in 10 mM PB solutions (pH 7.4) containing 0.97 M NaCl after addition of hang-DNA1 in the aqueous solution (a), 20% EtOH (b), and 20% IPA (c). A final AuNP concentration of 5 nM was used in all the experiments.

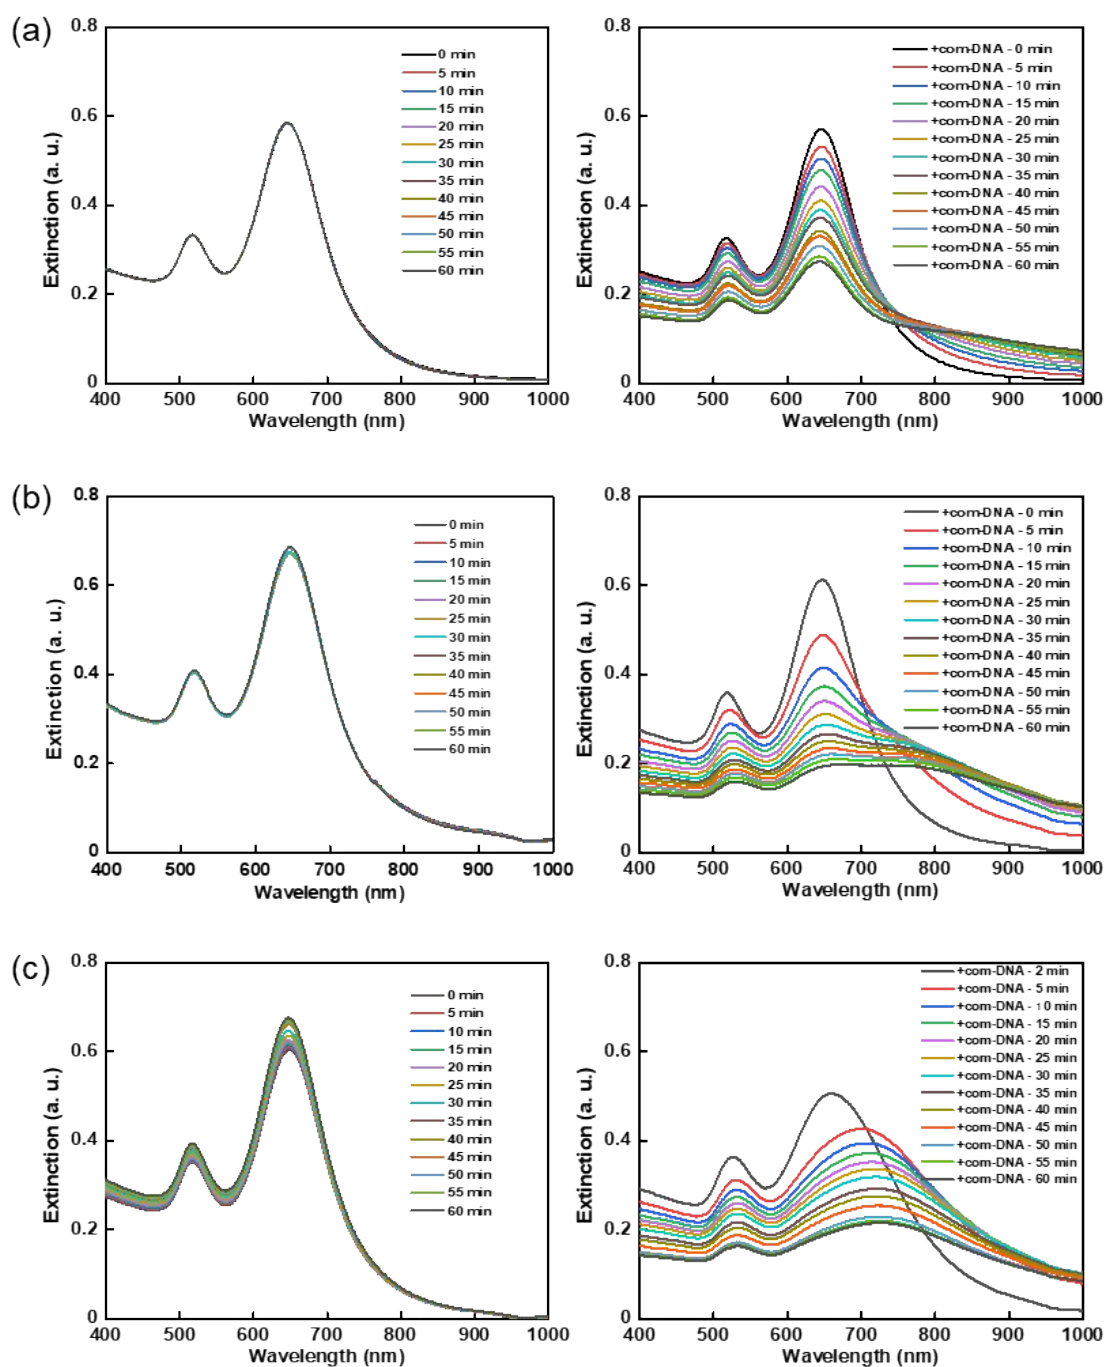

**Fig. S6** Time-dependent change of the extinction spectrum of DNA1-AuNRs before (left) and after (right) hybridization to com-DNA1 in the aqueous solution (a), 20% EtOH (b), and 20% IPA (c). A final AuNR concentration of 0.8 nM was used in all the experiments.

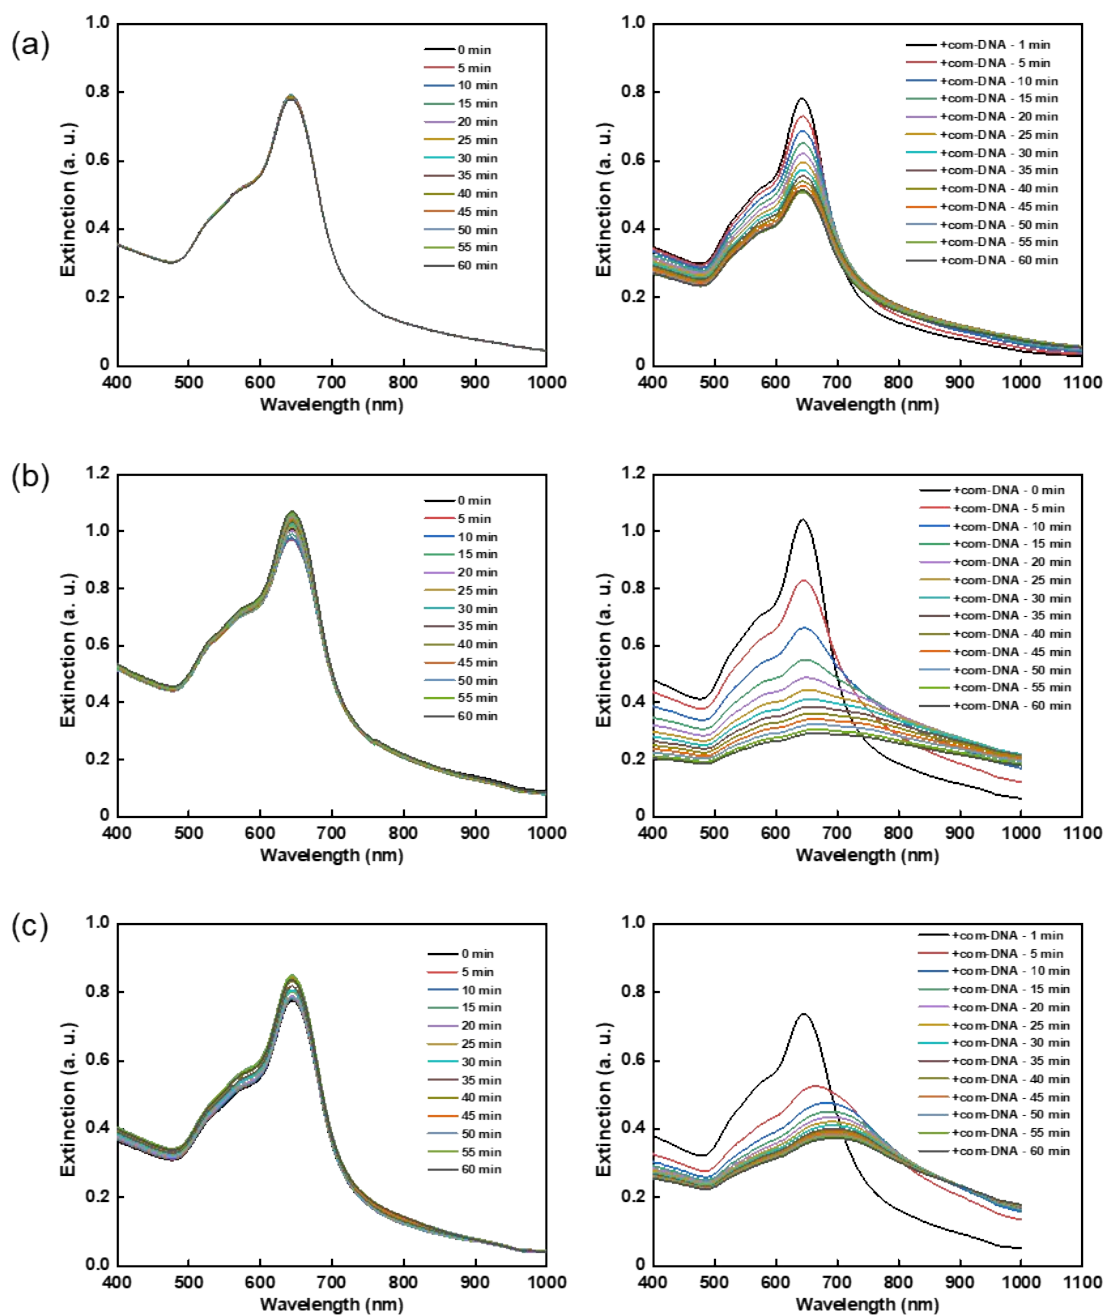

**Fig. S7** Time-dependent change of the extinction spectrum of DNA1-AuNTs before (left) and after (right) hybridization to com-DNA1 in the aqueous solution (a), 20% EtOH (b), and 20% IPA (c). A final AuNT concentration of 0.8 nM was used in all the experiments.

(a) DNA1-AuNRs

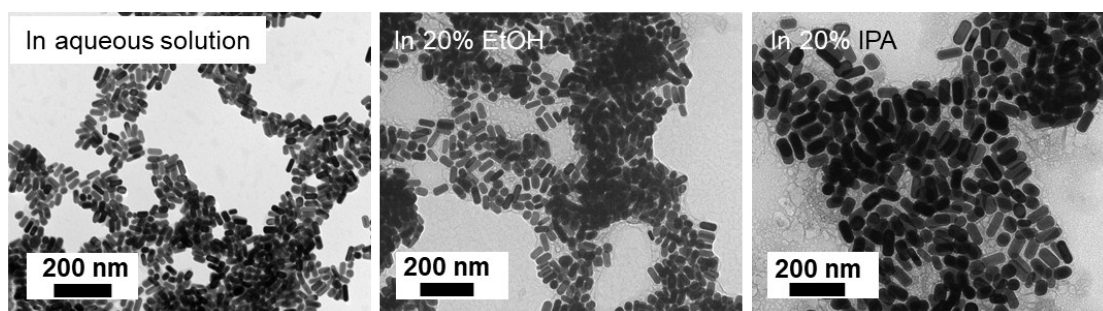

(b) DNA1-AuNTs

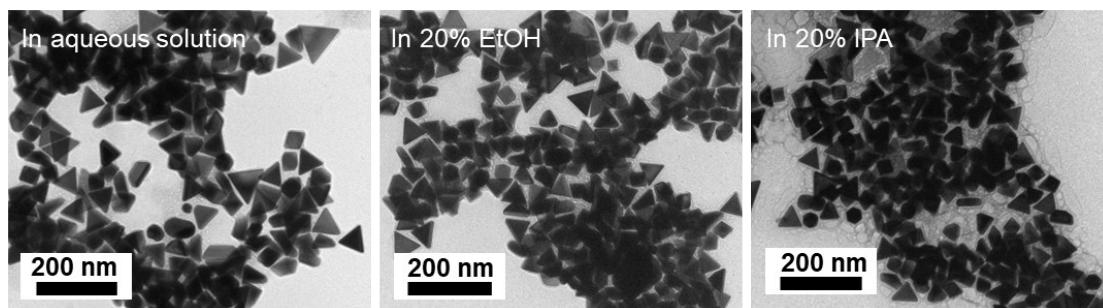

**Fig. S8** TEM images of DNA1–AuNRs (a) and DNA1–AuNTs (b) upon hybridization to com-DNA1 in the aqueous solution (left), 20% EtOH (center), and 20% IPA (right).

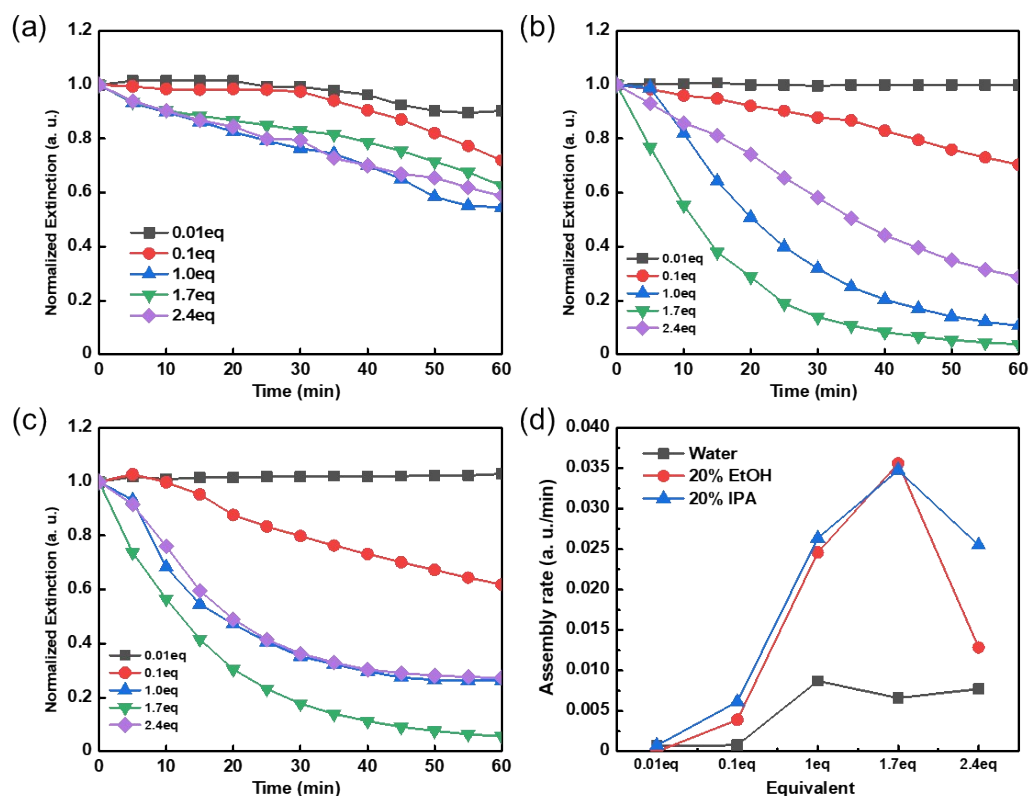

**Fig. S9** Target concentration dependence of non-crosslinking assembly of DNA–AuNPs. (a–c) Time course of the normalized extinction change at 550 nm for DNA1–AuNPs upon addition of com-DNA1 at various equivalents in the aqueous solution (a), 20% EtOH (b), and 20% IPA (c). (d) Relationship between the assembly rate of DNA1–AuNPs estimated by calculating the extinction decrease in the first 20 min and the equivalent of added com-DNA1 in the aqueous solution and the alcoholic solutions.
